# Supplementary material for: DNA Metabarcoding for Quality Control of Basil, Oregano, and Paprika
Source: Frontiers journal article supplement (doi:10.3389/fpls.2021.665618), 2021-06-04
Supplement: Data_Sheet_4.PDF [file Data_Sheet_4.PDF]

**S 4.1 DNA metabarcoding based identification of species products labeled as containing paprika**

| Sample ID | Capsicum annuum | Wind pollinated species | Wind spread species | Other ingredients |
|-----------|-----------------|-------------------------|---------------------|-------------------|
| KR18-03   | 1               | 1                       | 0                   | 1                 |
| KR18-04   | 1               | 0                       | 0                   | 0                 |
| KR18-07   | 0               | 1                       | 0                   | 0                 |
| KR18-13   | 1               | 1                       | 0                   | 0                 |
| KR18-17   | 1               | 0                       | 0                   | 0                 |
| KR18-19   | 1               | 0                       | 0                   | 0                 |
| KR18-23   | 0               | 1                       | 0                   | 0                 |
| KR18-26   | 1               | 1                       | 0                   | 0                 |
| KR18-28   | 1               | 0                       | 1                   | 0                 |
| KR18-34   | 1               | 0                       | 1                   | 1                 |
| KR18-38   | 1               | 0                       | 0                   | 1                 |
| KR18-45   | 1               | 0                       | 0                   | 0                 |
| KR18-58   | 0               | 0                       | 1                   | 0                 |

**S 4.2 DNA metabarcoding based identification of species products labeled as containing oregano**

| Sample ID | Origanum vulgare | Wind pollinated species | Wind spread species | Other ingredients |
|-----------|------------------|-------------------------|---------------------|-------------------|
| KR18-01   | 0                | 0                       | 0                   | 1                 |
| KR18-05   | 1                | 0                       | 1                   | 1                 |
| KR18-06   | 1                | 0                       | 1                   | 1                 |
| KR18-10   | 1                | 0                       | 1                   | 1                 |
| KR18-12   | 1                | 0                       | 1                   | 1                 |
| KR18-14   | 1                | 0                       | 0                   | 1                 |
| KR18-15   | 1                | 0                       | 0                   | 0                 |
| KR18-21   | 1                | 1                       | 0                   | 1                 |
| KR18-24   | 1                | 0                       | 0                   | 1                 |
| KR18-27   | 1                | 0                       | 1                   | 1                 |
| KR18-29   | 1                | 0                       | 1                   | 0                 |
| KR18-31   | 1                | 0                       | 0                   | 1                 |
| KR18-35^  | 1                | 1                       | 0                   | 1                 |
| KR18-36   | 1                | 1                       | 1                   | 0                 |
| KR18-41   | 1                | 1                       | 1                   | 1                 |
| KR18-42   | 1                | 0                       | 1                   | 0                 |
| KR18-44   | 1                | 1                       | 1                   | 1                 |
| KR18-47   | 1                | 0                       | 0                   | 1                 |
| KR18-48   | 1                | 1                       | 0                   | 1                 |
| KR18-50   | 1                | 1                       | 1                   | 1                 |
| KR18-55   | 1                | 0                       | 1                   | 0                 |
| KR18-57   | 1                | 1                       | 1                   | 1                 |
| KR18-61   | 1                | 1                       | 1                   | 1                 |
| KR18-62   | 1                | 1                       | 1                   | 1                 |

^ includes both basilikum and oregano according to the produkt label.

**S 4.3 DNA metabarcoding based identification of species products labeled as containing basil**

| Sample ID | Ocimum<br>basilicum\$ | Wind<br>pollinated<br>species | Wind spread<br>species | Other<br>ingredients |
|-----------|-----------------------|-------------------------------|------------------------|----------------------|
| KR18-02   | 1                     | 1                             | 0                      | 1                    |
| KR18-08   | 1                     | 1                             | 0                      | 1                    |
| KR18-11   | 1                     | 1                             | 0                      | 1                    |
| KR18-18   | 1                     | 1                             | 0                      | 1                    |
| KR18-20   | 1                     | 1                             | 0                      | 1                    |
| KR18-22   | 1                     | 0                             | 0                      | 1                    |
| KR18-25   | 1                     | 1                             | 0                      | 1                    |
| KR18-30   | 1                     | 1                             | 0                      | 1                    |
| KR18-32   | 0                     | 1                             | 0                      | 1                    |
| KR18-35^  | 1                     | 1                             | 0                      | 1                    |
| KR18-37   | 1                     | 1                             | 0                      | 1                    |
| KR18-39   | 1                     | 0                             | 0                      | 1                    |
| KR18-40   | 1                     | 0                             | 0                      | 1                    |
| KR18-43   | 1                     | 1                             | 0                      | 1                    |
| KR18-49   | 1                     | 1                             | 0                      | 1                    |
| KR18-51   | 0                     | 1                             | 1                      | 1                    |
| KR18-56   | 1                     | 0                             | 0                      | 1                    |
| KR18-59   | 1                     | 1                             | 0                      | 1                    |

\$ Ocimum basilicum can not be discriminated by Ocimum americanum by using ITS2. It is unlikely that products contain Ocimum americanum.

^ Both basil and oregano are listed on the product label.
